# Supplementary material for: A Mutation in the FAM83G Gene in Dogs with Hereditary Footpad Hyperkeratosis (HFH)
Source: PLoS Genet. 2014 May 15;10(5):e1004370. doi: 10.1371/journal.pgen.1004370 (PMC4022470; doi:10.1371/journal.pgen.1004370)
Supplement: Table S2 — Control dogs from other breeds. (XLSX) [file pgen.1004370.s003.xlsx]

## Sheet: Control Dogs FAM83G_Exon 2
Table S2. Control dogs from other breeds
Breed Abbreviation	Breed	Number of dogs
AU	Australian Shepherd	7
BA	Barbet	8
BC	Border Collie	8
BD	Bearded Collie	7
BE	Beagle	12
BR	Briard	7
CC	Chinese Crested Dog	8
CE	Cairn Terrier	8
CS	Cão da Serra de Aires	8
DH	Dachshund	8
DO	Doberman Pinscher	8
EL	Elo	8
GP	Poodle (Grosspudel)	8
GR	Golden Retriever	8
GY	Greyhound	8
LA	Labrador Retriever	8
LB	Leonberger	8
LN	Landseer	8
MA	Malinois	7
MU	Mudi	7
MX	Mexican Hairless Dog	6
NF	Newfoundland	8
NS	Schapendoes	8
NW	Norwich Terrier	8
PE	Perro de Agua Espanõl	8
PH	Peruvian Hairless Dog	7
PO	Polski Owczarek Nizinny	8
RP	Rehpinscher (Miniature Pinscher)	6
RR	Rhodesian Ridgeback	8
SB	St. Bernhard	8
SC	Scottish Terrier	8
SY	Siberian Husky	8
WH	Whippet	8
WS	Wolfspitz (Keeshound)	8
WW	West Highland White Terrier	6
YT	Yorkshire Terrier	8
ZS	Zwergspitz (Pomeranian)	8
		288
